# Supplementary material for: Patch behaviour and predictability properties of modelled finite-amplitude sand ridges on the inner shelf
Source: Copernicus journal article supplement (doi:10.5194/npg-15-943-2008), 2008-12-08
Supplement: Supplementary file 1 [file npg-15-943-2008-supplement.zip]

Archive with 1 entries (1 files):
- npg2008-0081-suppl_note.pdf
